# Supplementary material for: The Bacterial and Fungal Compositions in the Rhizosphere of Asarum heterotropoides Fr. Schmidt var. mandshuricum (Maxim.) Kitag. in a Typical Planting Region
Source: MDPI journal article supplement (doi:10.3390/microorganisms12040692), 2024-03-29
Supplement: s1 [file s1]

## Supplementary material

PCR amplification of soil bacterial: Each sample was amplified by PCR using a 20  $\mu$ L reaction with 5 M of each primer. The PCR system included 5 $\times$ bufer (4  $\mu$ L), 2.5 mM dNTPs (2  $\mu$ L), 5  $\mu$ M forward and reverse Primer (0.8  $\mu$ L), 2.5 U/ $\mu$ L FastPfu Polymerase (0.4  $\mu$ L), 20 mg/mL BSA (0.2  $\mu$ L) and Template DNA (10 ng), adding ddH<sub>2</sub>O to 20  $\mu$ L. The PCR reactions were performed by an ABI GeneAmp® PCR System 9700 (Thermo Fisher Scientific) that used the following cycling conditions: initial denaturation step at 95°C for 3 min (1 cycle); 27 cycles at 95°C for 30 s, 55 °C for 30 s, 72°C for 45 s, a final extension step at 72°C for 10 min (1 cycle).

PCR amplification of soil fungi: Each sample was amplified by PCR using a 20  $\mu$ L reaction with 5 M of each primer. The PCR system included 10 $\times$ bufer (2  $\mu$ L), 2.5 mM dNTPs (2  $\mu$ L), 5  $\mu$ M forward and reverse Primer (0.8  $\mu$ L), 2.5 U/ $\mu$ L rTaq Polymerase (0.2  $\mu$ L), 20 mg/mL BSA (0.2  $\mu$ L) and Template DNA (10 ng), adding ddH<sub>2</sub>O to 20  $\mu$ L. The PCR reactions were performed by an ABI GeneAmp® PCR System 9700 (Thermo Fisher Scientific) that used the following cycling conditions: initial denaturation step at 95 °C for 3 min (1 cycle); 35 cycles at 95°C for 30 s, 55°C for 30 s, 72°C for 45 s, a final extension step at 72°C for 10 min (1 cycle).

**Figure S1.** Relative abundances of rhizosphere (A) bacterial and (B) fungal dominant phylum composition grouped by collecting month. Relative abundances of rhizosphere (C) bacterial and (D) fungal dominant order composition grouped by cropping year. Relative abundances of rhizosphere (E) bacterial and (F) fungal dominant order composition grouped by collecting month.

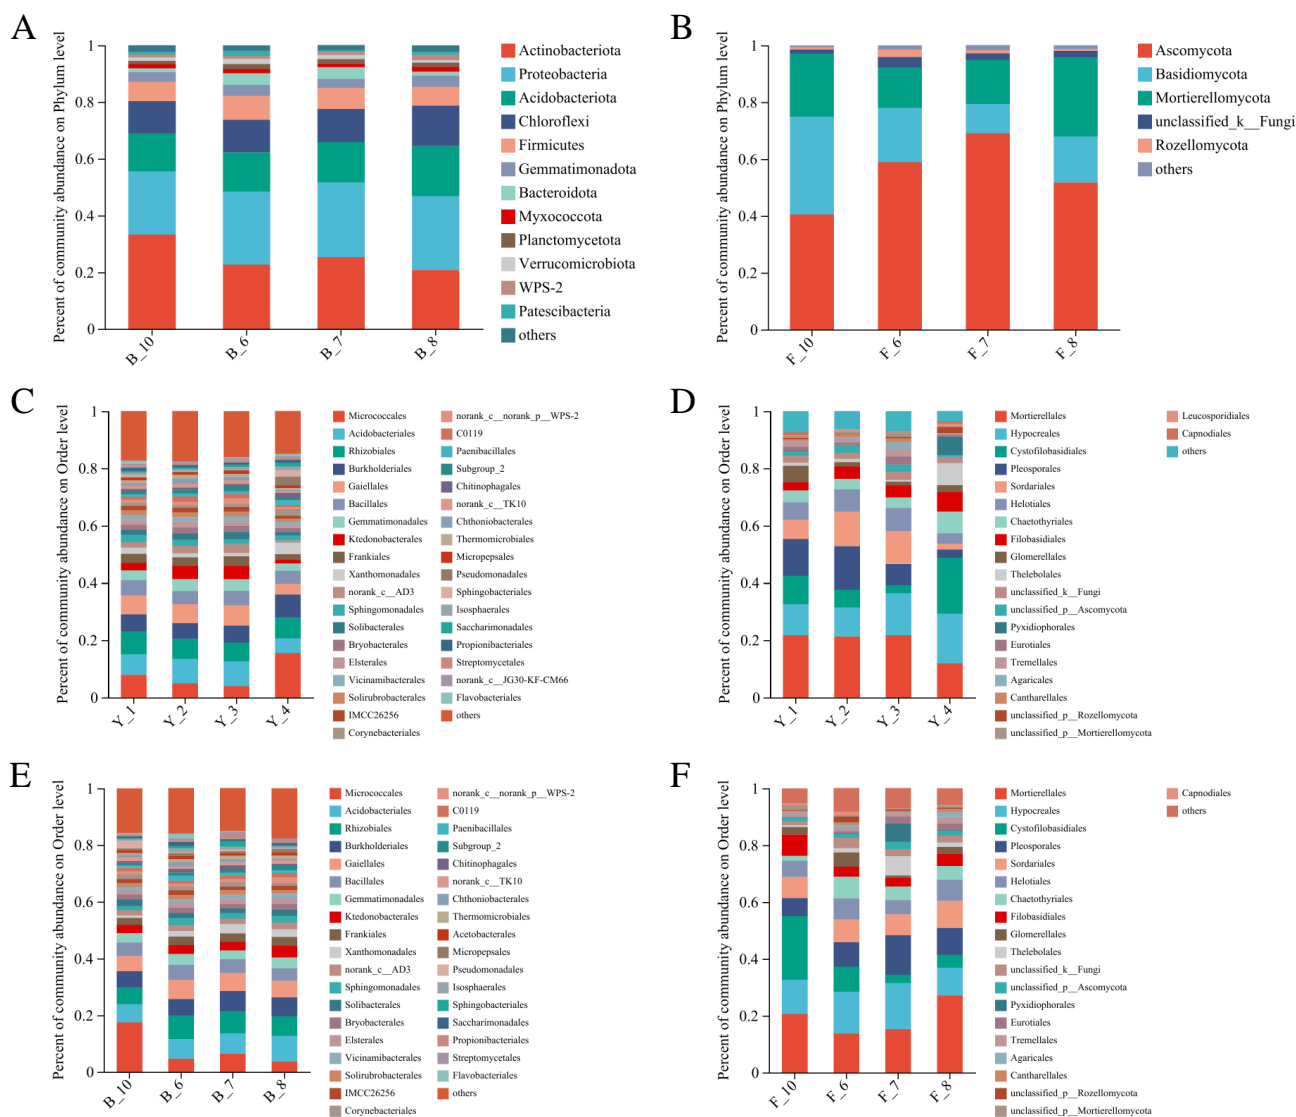

**Figure S2.** Beta-diversity analysis of (A) bacterial and (B) fungal community grouped by collecting month by a non-metric multidimensional scaling plot based on Bray-Curtis distance.

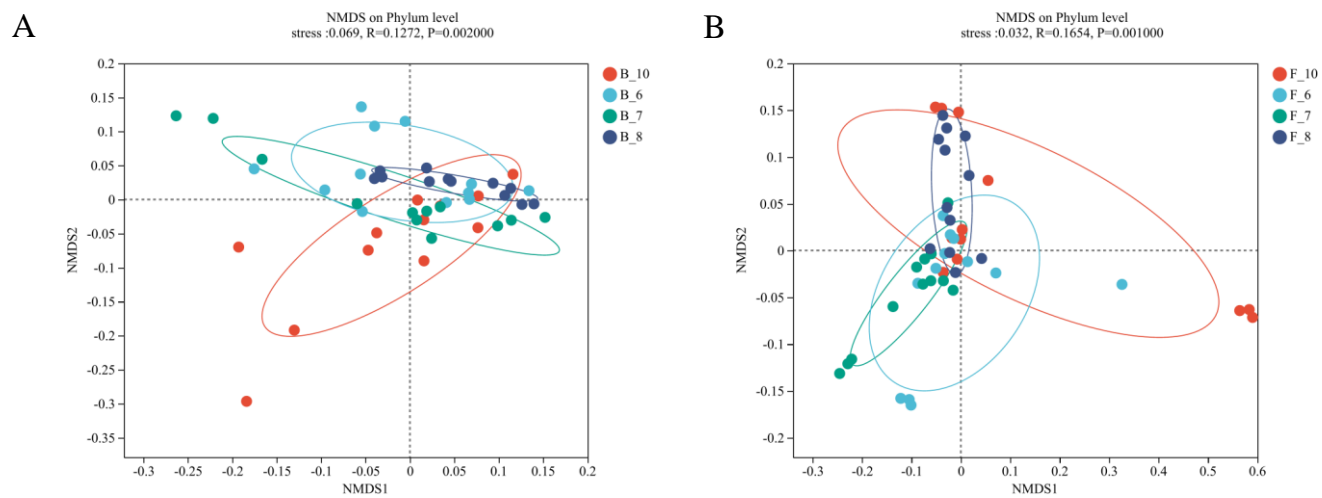

Table S1 Alpha diversity index statistics of bacterial grouped by cropping year

| <div>P value</div> <div>Estimators</div> | Y_1 vs Y_2 | Y_1 vs Y_3 | Y_4 vs Y_1 | Y_2 vs Y_3 | Y_2 vs Y_4 | Y_3 vs Y_4 |
|------------------------------------------|------------|------------|------------|------------|------------|------------|
| ace                                      | $\geq 0.1$ | $\geq 0.1$ | $< 0.05$   | $\geq 0.1$ | $< 0.05$   | $< 0.1$    |
| chao                                     | $\geq 0.1$ | $\geq 0.1$ | $< 0.001$  | $\geq 0.1$ | $< 0.001$  | $< 0.05$   |
| shannon                                  | $\geq 0.1$ | $\geq 0.1$ | $< 0.05$   | $\geq 0.1$ | $< 0.01$   | $< 0.05$   |
| simpson                                  | $\geq 0.1$ | $\geq 0.1$ | $< 0.1$    | $\geq 0.1$ | $< 0.1$    | $< 0.1$    |
| sobs                                     | $\geq 0.1$ | $\geq 0.1$ | $< 0.01$   | $\geq 0.1$ | $< 0.001$  | $< 0.05$   |

Table S2 Alpha diversity index statistics of bacterial grouped by sample month

| <div>P value</div> <div>Estimators</div> | B_10 vs B_6 | B_10 vs B_7 | B_8 vs B_10 | B_6 vs B_7 | B_6 vs B_8 | B_7 vs B_8 |
|------------------------------------------|-------------|-------------|-------------|------------|------------|------------|
| ace                                      | $\geq 0.1$  | $\geq 0.1$  | $\geq 0.1$  | $\geq 0.1$ | $\geq 0.1$ | $\geq 0.1$ |
| chao                                     | $\geq 0.1$  | $\geq 0.1$  | $\geq 0.1$  | $\geq 0.1$ | $\geq 0.1$ | $\geq 0.1$ |
| shannon                                  | $< 0.1$     | $\geq 0.1$  | $< 0.05$    | $\geq 0.1$ | $\geq 0.1$ | $\geq 0.1$ |
| simpson                                  | $< 0.1$     | $\geq 0.1$  | $< 0.1$     | $\geq 0.1$ | $\geq 0.1$ | $\geq 0.1$ |
| sobs                                     | $\geq 0.1$  | $< 0.1$     | $\geq 0.1$  | $\geq 0.1$ | $\geq 0.1$ | $< 0.05$   |

Table S3 Alpha diversity index statistics of fungal grouped by cropping year

| <div>P value</div> <div>Estimators</div> | Y_1 vs Y_2 | Y_1 vs Y_3 | Y_4 vs Y_1 | Y_2 vs Y_3 | Y_2 vs Y_4 | Y_3 vs Y_4 |
|------------------------------------------|------------|------------|------------|------------|------------|------------|
| ace                                      | $\geq 0.1$ | $< 0.01$   | $< 0.001$  | $\geq 0.1$ | $< 0.01$   | $\geq 0.1$ |
| chao                                     | $\geq 0.1$ | $< 0.05$   | $< 0.001$  | $\geq 0.1$ | $< 0.001$  | $< 0.01$   |
| shannon                                  | $\geq 0.1$ | $\geq 0.1$ | $< 0.001$  | $\geq 0.1$ | $< 0.001$  | $< 0.001$  |
| simpson                                  | $\geq 0.1$ | $\geq 0.1$ | $< 0.05$   | $\geq 0.1$ | $< 0.05$   | $< 0.01$   |
| sobs                                     | $\geq 0.1$ | $\geq 0.1$ | $< 0.001$  | $\geq 0.1$ | $< 0.001$  | $< 0.001$  |

Table S4 Alpha diversity index statistics of fungal grouped by sample month

| <div>P value</div> <div>Estimators</div> | F_10 vs F_6 | F_10 vs F_7 | F_8 vs F_10 | F_6 vs F_7 | F_6 vs F_8 | F_7 vs F_8 |
|------------------------------------------|-------------|-------------|-------------|------------|------------|------------|
| ace                                      | $< 0.05$    | $\geq 0.1$  | $< 0.05$    | $\geq 0.1$ | $\geq 0.1$ | $\geq 0.1$ |
| chao                                     | $< 0.05$    | $\geq 0.1$  | $< 0.05$    | $\geq 0.1$ | $\geq 0.1$ | $\geq 0.1$ |
| shannon                                  | $\geq 0.1$  | $\geq 0.1$  | $\geq 0.1$  | $\geq 0.1$ | $\geq 0.1$ | $\geq 0.1$ |
| simpson                                  | $\geq 0.1$  | $\geq 0.1$  | $\geq 0.1$  | $\geq 0.1$ | $\geq 0.1$ | $\geq 0.1$ |
| sobs                                     | $< 0.05$    | $\geq 0.1$  | $< 0.1$     | $\geq 0.1$ | $\geq 0.1$ | $\geq 0.1$ |
